# Supplementary material
Source: Springer Nature journal article supplement (https://www.springermedizin.de/resource/supplementary/12965_2006_38_MOESM9_ESM.pdf/9572986)

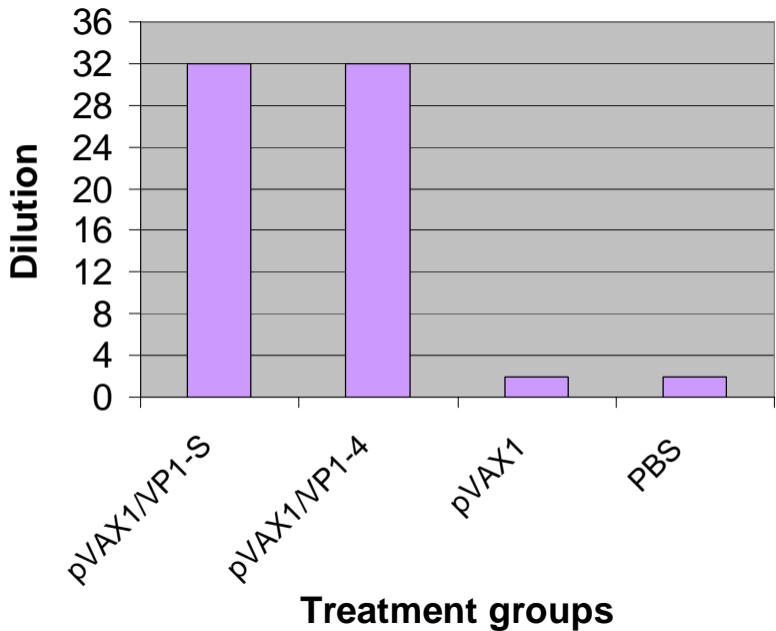

Supplement: MOESM9 [file 9572986]
